# Supplementary material for: Aspen Plus Simulation of Chemical Looping Combustion of Syngas and Methane in Fluidized Beds
Source: Research Square preprint supplement (doi:10.21203/rs.3.rs-2220474/v1), 2022-11-05
Supplement: Supplementary file 1 [file 37db7b45893ec891720e6dac.docx]

1. Files

All related Aspen Files and Excel Files and many PDF files, etc. will be put in these locations:

Shortened URL:

1. https://bit.ly/Jasper-2022-DCE

Longer URL (just in case)

1. https://aggiesncat-my.sharepoint.com/:f:/g/personal/mnjasper_aggies_ncat_edu/EpQ4azhHs9dEs2f3SL1vbsMB5Z2VoIldJ-8DEPfCZ3oP6Q?e=3jMn7F
2. Gasification Reactions and Models

## Pyrolysis Model

The pyrolysis model was used from Petersen 2005. It assumes that hydrogen is limiting. The XCH4 and XTar are used to adjust the percentage of methane and tar (C6H6) and consequently the C2H4 as well. XCO is used to adjust the ratio of CO to CO2 formed from the oxygen. For this work, XCO = 0.3, XCH4 = 0.1673, and XTar = 0.05.

## Fuel Air Equivalence Ratio

### Stoichiometric Combustion of Solid Fuel

## Reactions

Table C.1- Reaction Kinetics Used in Simulation Model

| No. | Reaction | Kinetic Expression  (kmol/m3/s) | k0 | Ea / ΔG° (kJ/kmol) | Source |
| --- | --- | --- | --- | --- | --- |
| R1-CPOX | C + 0.5 O2 → CO |  | 2.30  [m/s/K] | 92290.535 | Hobbs 1992 |
| R2-CSG | C + H2O → CO + H2 |  | 3.6e+12  [m3/kmol/s] | 310,000 | Jess 1995 Hobbs 1992 |
| R3-CCG | C + CO2 → 2 CO |  | 3.6e+12  [m3/kmol/s] | 310,000 | Jess 1995 Hobbs 1992 |
| R4-CM | C + 2 H2 C→ CH4 |  | 1.11e-1  [m3/kmol/s] | 43210.88 | Calculated |
| MD K | CH4 ↔ C + 2 H2 |  | 403898 | 87748.323 | Gibbs |
| R5-MD | CH4 C→ C + 2 H2 |  | 5.4e+3  [1/s] | 130959.2 | Kobayashi 1992 |
| R6-HOX | H2 + 0.5 O2 → H2O |  | 7.688e8 [m3/kmol/s] | 156900 | Wurzenberger 2002  Groppi 2000  Mitani 1980 |
| R7-COX | CO + 0.5 O2 → CO2 |  | 3.09e4 [m3/kmol/s] | 99760 | Aspen 2013 MBG Cen 1998  Liu DOE 2014 |
| R8-WGS | H2O + CO C→ H2 + CO2 |  | 2777.78  [m3/kmol/s] | 12560 | Biba 1978  Gerber 2010 |
| WGS K | H2O + CO ↔ H2 + CO2 |  | 0.01702 | -37238.044 | Gibbs |
| R8r-WGSR | H2 + CO2 C→ H2O + CO |  | 163192  [m3/kmol/s] | 49798.044 | Calculated |
| R9-MPOX |  |  | 4.4e11 [m3/kmol/s] | 125520 | Jones 1988 |
| R10-MSR |  |  | 3.0e8 [m3/kmol/s] | 125520 | Jones 1988 |
| R11-MDR |  |  | 3.0e8 [m3/kmol/s] | 125520 | Jones 1988 |
| R12-EPOX |  |  | 4.2e11 [m3/kmol/s] | 125520 | Jones 1988 |
| R13-ESR |  |  | 3.0e8 [m3/kmol/s] | 125520 | Jones 1988 |
| R14-EDR |  |  | 3.0e8 [m3/kmol/s] | 125520 | Jones 1988 |
| R15-TPOX |  |  | 3.4e11 [m3/kmol/s] | 125520 | Jones 1988 |
| R16-TSR |  |  | 3.0e8 [m3/kmol/s] | 125520 | Jones 1988 |
| R17-TDR |  |  | 3.0e8 [m3/kmol/s] | 125520 | Jones 1988 |
| CnHm + O2 |  |  | 4.6e11 [m3/kmol/s] | 125520 | Jones 1988  (Modified) |
| CnHm + H2O |  |  | 3.0e8 [m3/kmol/s] | 125520 | Jones 1988 |
| CnHm + CO2 |  |  | 3.0e8 [m3/kmol/s] | 125520 | Jones 1988, Hobbs 1992  (Assumed) |

## Aspen Plus Model

The Aspen Plus model was set up to duplicate the input fuel stream into four separate reactors, the Gibbs, the PFR, the CSTR, and the FB reactors. Figure 3.1 shows the gasification setup in Aspen Plus to test the different reactor models. All reactors are set to 0.11781 m3 in volume at 750 °C and 1 atm (Porrazzo 2005). All streams have the same input from Petersen 2005. The fuel is fed at a feed rate of 0.004789 kg/s and the air flow is 0.009602 kg/s. This gives a velocity exiting the reactors at utop = 5 m/s and an air-fuel equivalence ratio λ = 0.6. The biomass fuel composition is given in Table C.2. **Note: this is not the Aspen model used in the paper, just an illustration of the gasification Aspen Model.**

Table C.2 - Biomass Composition

| Proximate analysis (wt. fraction) |  |
| --- | --- |
| Moisture, wt% (raw) | 7.3 |
| Fixed Carbon (FC), wt% (dry) | 9.061057 |
| Volital Matter (VM), wt% (dry) | 45.52362 |
| Ash, wt% (dry) | 45.41532 |
| Ultimate analysis |  |
| Ash, wt% (dry) | 45.41532 |
| C, wt% (dry) | 27.61985 |
| H, wt% (dry) | 3.602589 |
| N, wt% (dry) | 3.875512 |
| Cl, wt% (dry) | 0 |
| S, wt% (dry) | 0.655016 |
| O, wt% (dry) | 18.83172 |


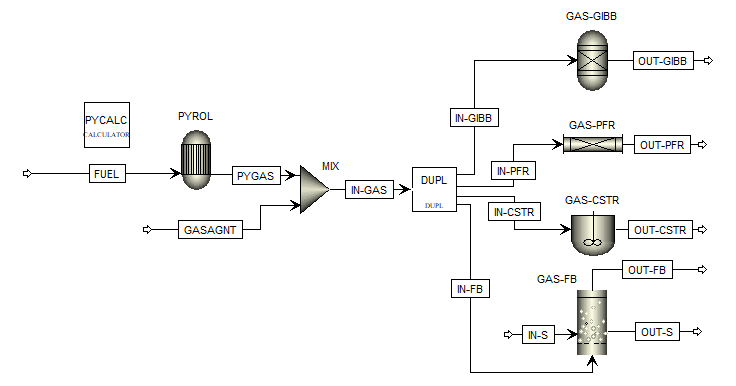


Figure C.1 - Aspen Plus setup to test different kinds of fluidized bed reactor models.

## Results

Table A.2 shows the composition of the syngas exiting the gasifier in mole fraction for different model types in Aspen Plus. The built-in FB unit process most closely resembles the single PFR but is in between the CSTR and the PFR. This is because the FB unit process most likely contains a two or three phase model with many stages of parallel PFRs and CSTRs in series, but Aspen Plus does not disclose the details of the model. All of the reactors give similar results in this case. The CSTR is the most different because it does not allow the same amount of time for the reactions to progress. The Gibbs equilibrium model usually overestimates the reaction conversion. This is because it does not have a fixed reactor size and assumed that all reactions are taken to completion, with factors like hydraulic retention time, reaction rate, activation energy, or catalysts not being considered.

Table C.3 - Syngas Mole Fractions using different Aspen Plus Model types.

|  | CSTR | PFR | FB | GIBBS |
| --- | --- | --- | --- | --- |
| H2 | 11.73% | 10.22% | 10.22% | 10.16% |
| CO | 13.27% | 9.06% | 9.17% | 9.10% |
| H2O | 8.95% | 10.61% | 10.61% | 10.66% |
| CO2 | 9.86% | 12.67% | 12.59% | 12.62% |
| CH4 | 0.66% | 0.00% | 0.00% | 0.00% |
| C2H4 | 0.43% | 0.00% | 0.00% | 0.00% |
| C6H6 | 0.37% | 0.00% | 0.00% | 0.00% |
| N2 | 54.48% | 57.26% | 57.22% | 57.26% |
| O2 | 0.07% | 0.00% | 0.00% | 0.00% |


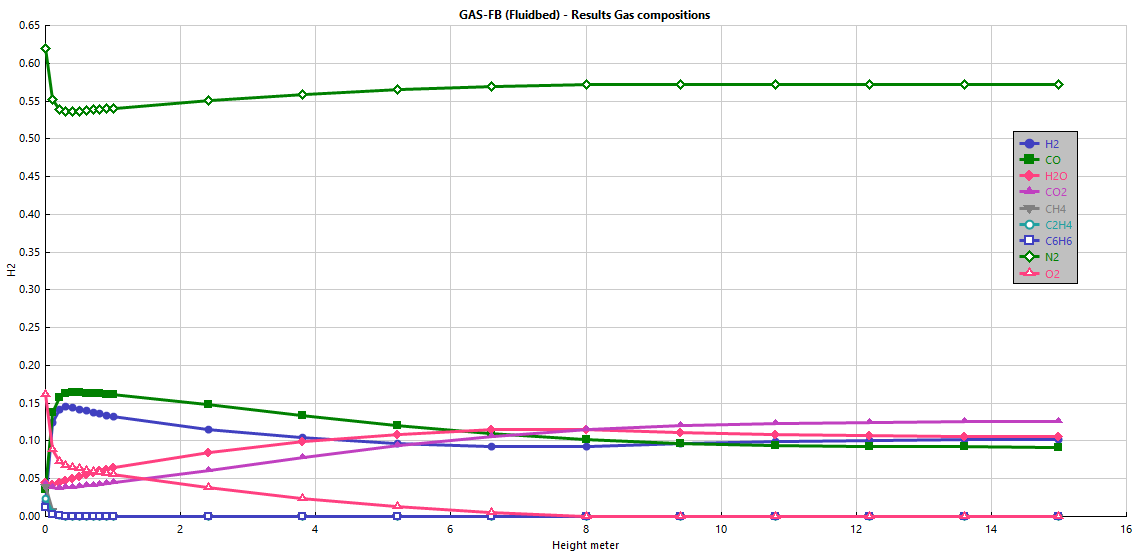


Figure C.2 - The gas composition inside of the FB reactor in mole fraction (vol%)
